# Supplementary material for: Macroporous three-dimensional graphene oxide foams for dye adsorption and antibacterial applications
Source: Royal Society of Chemistry journal article supplement (doi:10.1039/c5ra19925e), 2015-12-18
Supplement: c5ra19925e1.pdf [file c5ra19925e1.pdf]

**Supporting information for**

**Macroporous three-dimensional graphene oxide foams for  
dye adsorption and antibacterial applications**

*Swetha Jayanthi<sup>a</sup>, Neerugatti KrishnaRao Eswar<sup>a</sup>, Satyapaul A. Singh<sup>b</sup>, Kaushik Chatterjee<sup>c</sup>,*

*Giridhar Madras<sup>\*b</sup> and A.K. Sood<sup>d</sup>*

<sup>a</sup> Centre for Nano Science and Engineering, <sup>b</sup> Department of Chemical Engineering,

<sup>c</sup> Department of Materials Engineering, <sup>d</sup> Department of Physics,

Indian Institute of Science, Bangalore-560012, India

\*Corresponding author. Tel. +91 80 22932321; Fax: +91 80 23600683,

E-mail: [giridhar@chemeng.iisc.ernet.in](mailto:giridhar@chemeng.iisc.ernet.in) (G. Madras)

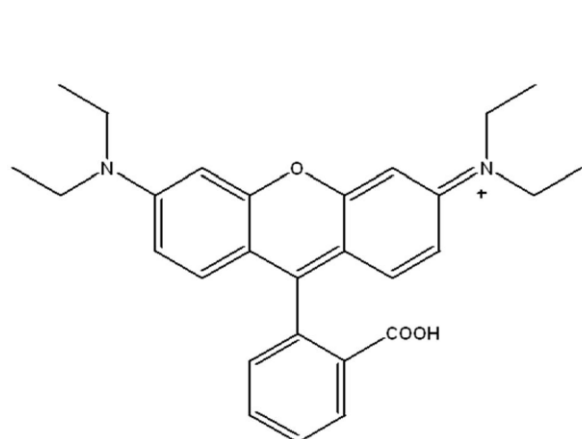

**Rhodamine B**  
(Xanthene fluorine)

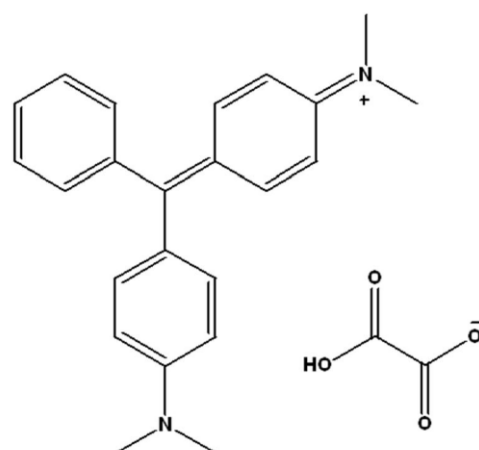

**Malachite green oxalate**  
(Triaryl methane)

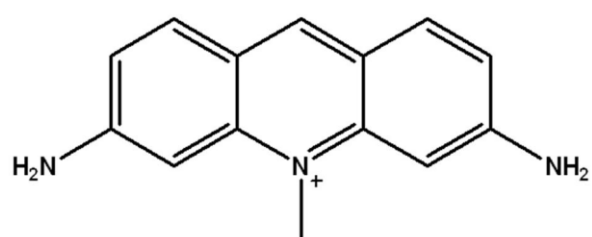

**Acriflavine**  
(Acridine)

**Figure S1:** Structure of the dyes

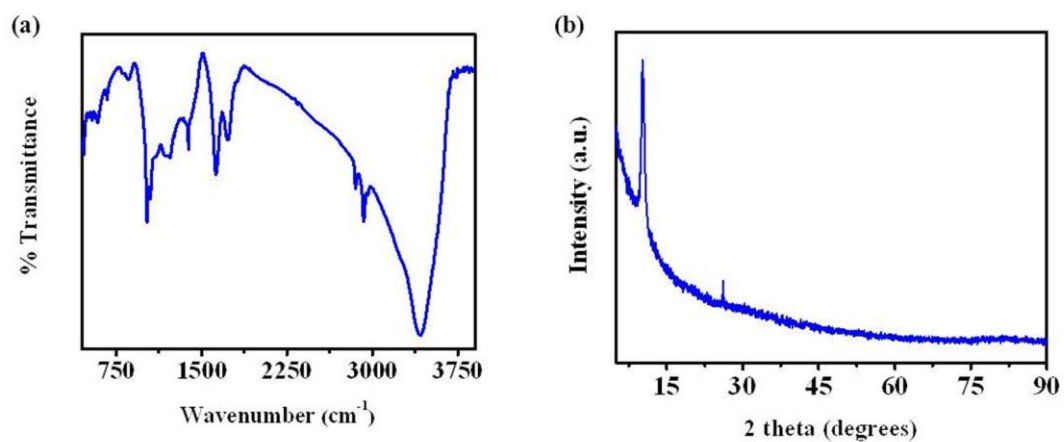

**Figure S2:** (a) FT-IR spectrum and (b) XRD spectrum of GO foam.

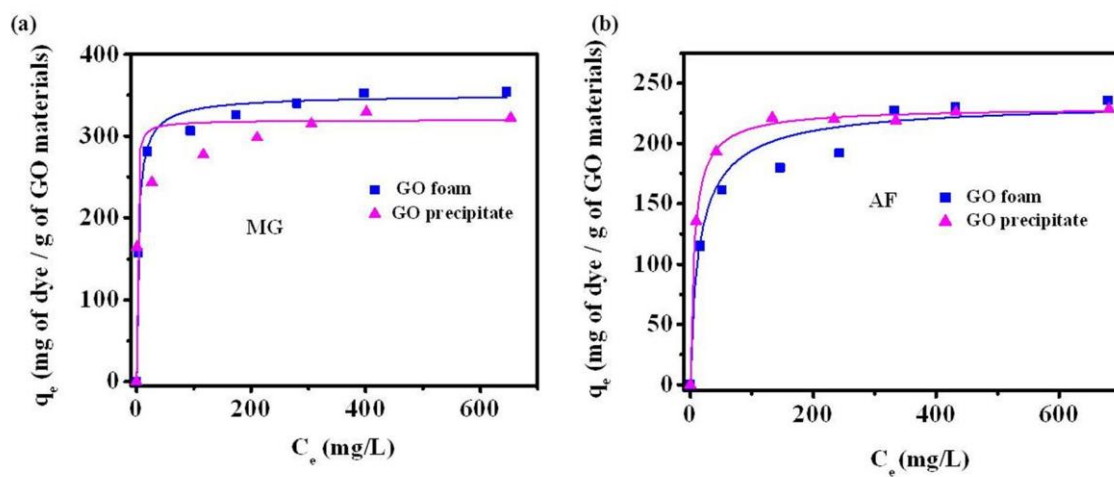

**Figure S3:** Comparison plot of adsorption isotherms of (a) MG and (b) AF on GO foam and GO precipitate.

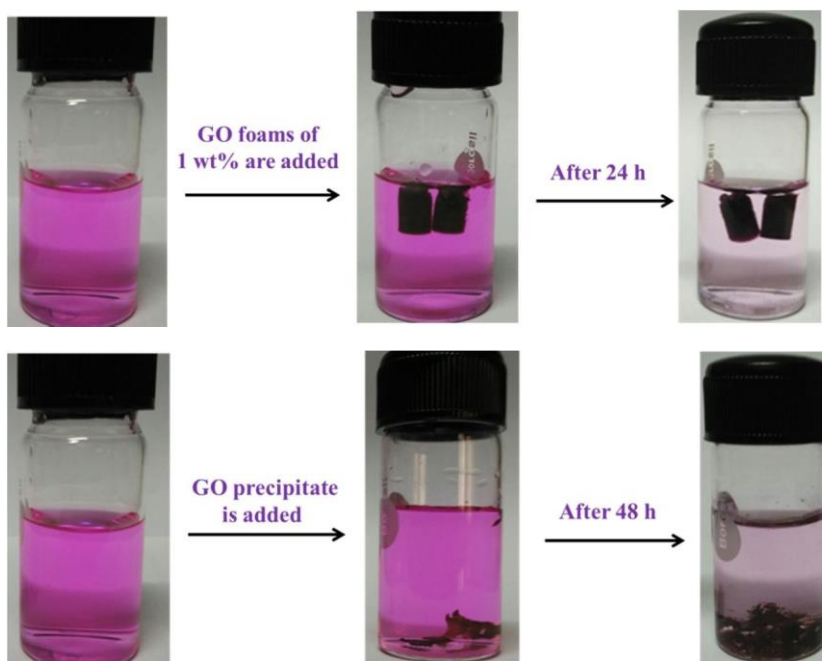

**Figure S4:** Photographs displaying the complete adsorption of RB dye on GO foam and GO precipitate.

Concentration of the dye solution is 5 ppm and the amount of the material used is 6 mg.

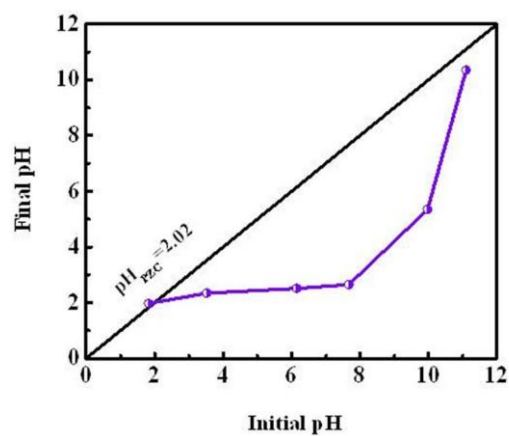

**Figure S5:** Plot showing point of zero charge of GO foam under different pH conditions

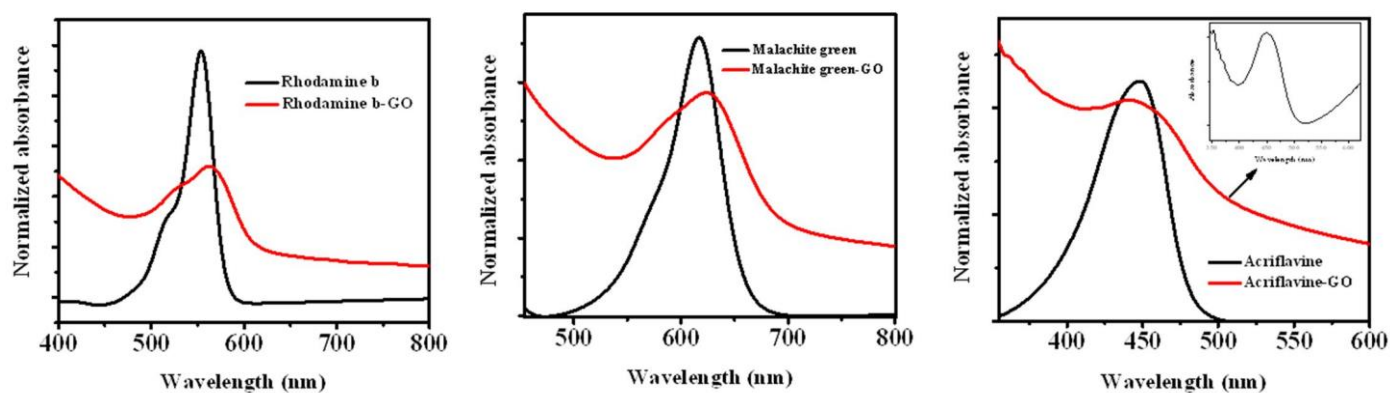

**Figure S6:** UV-Vis spectra of GO foam before and after interactions with RB, MG and AF dye molecules.

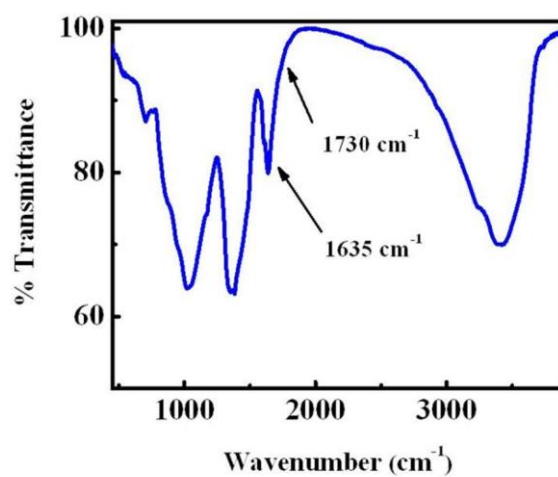

**Figure S7:** FT-IR spectrum of GO foam adsorbed with AF molecules under alkaline conditions.
